# Supplementary material
Source: PubMed Central journal article supplement (PMC8480152)
Supplement: ehp8196.s001.acco.pdf [file ehp8196.s001.acco.pdf]

**Note to readers with disabilities:** *EHP* strives to ensure that all journal content is accessible to all readers. However, some figures and Supplemental Material published in *EHP* articles may not conform to [508 standards](#) due to the complexity of the information being presented. If you need assistance accessing journal content, please contact [ehp508@niehs.nih.gov](mailto:ehp508@niehs.nih.gov). Our staff will work with you to assess and meet your accessibility needs within 3 working days.

### **Supplemental Material**

#### **Examining the Developmental Trajectory of an *in Vitro* Model of Mouse Primordial Germ Cells following Exposure to Environmentally Relevant Bisphenol A Levels**

Steen K.T. Ooi, Hui Jiang, Yanyuan Kang, and Patrick Allard

#### **Table of Contents**

**Figure S1. Line graph showing ELISA standard curves generated using either kit-supplied or in-lab dissolved Bisphenol A (BPA) used in experiments.** Data generated using BPA ELISA Kit, Detroit R & D, Inc. B indicates absorbance at 450nm observed at defined concentrations; B<sub>0</sub> indicates absorbance at 450nm observed in maximum binding wells (Sample Dilution Buffer only). For numerical values, see Excel Table S1.

**Figure S2. Cell number analysis of following 48-hour Bisphenol A (BPA) exposure of ESCs.** (A) Cartoon showing BPA exposure strategy. Illustration in part created with ©BioRender - biorender.com, as per the Biorender terms and conditions. Abbreviations are: Embryonic stem cell (ESC) and Leukemia inhibitory factor (LIF). (B) Scatter-bar plot indicating cell counts of *Blimp1-mVenus stella-ECFP* (BVSC) ESCs exposed to the different BPA doses indicated: error bars indicate mean +/- standard deviation. n = 4 for each condition. One-way ANOVA, p > 0.05. Calculated one-way ANOVA with Šidák-adjusted p values for comparison to water: p > 0.05 (vs. 1 nM); p > 0.05 (vs. 10 nM), p > 0.05 (vs. 100 nM); p > 0.05 (vs. 1 μM); and p > 0.05 (vs. 10 μM). For numerical values, see Excel Table S3.

**Figure S3. Cell number analysis of two male (XY) epiblast-like cell (EpiLC) cell lines following Bisphenol A (BPA) exposure.** Scatter-bar plot indicating cell counts of epiblast-like cells (EpiLCs) derived from either a wild-type *Embryonic stem* (ES) cell line (v6.5) or male *Blimp1-mVenus stella-ECFP* (BVSC) cell line (R8) exposed to the different Bisphenol A (BPA) doses indicated: error bars represent mean +/- standard deviation. n = 12 for each condition. One-way ANOVA p-values are > 0.05 for both (v6.5) and BVSC-R8). For numerical values, see Excel Table S3.

**Figure S4. Cell number and transcriptome analysis of day 5 (d5) PGC-like cells (PGCLCs) derived from Bisphenol A (BPA)-exposed male (XY) epiblast-like cells (EpiLCs).** **A** Scatter-bar plots showing absolute numbers of BVSC-R8 (male) cells in the different gated sub-populations indicated following exposure of EpiLCs to 100nM BPA. Error bars represent mean +/- standard deviation. n = 16 for each condition. Mann-Whitney Test p-values for R8 are > 0.05 for live cells; Blimp1-Stella-/DN (non-germ cells); Blimp1<sup>+</sup>Stella-/SP (presumed transitioning germ cells); and Blimp1<sup>+</sup>Stella<sup>+</sup>/DP (PGCLCs). For numerical values, see Excel Table S4. **B** Principal Component Analysis (PCA) of transcriptome of d5 DP/BVSC cells, derived from untreated or 100 nM BPA-exposed EpiLCs. For full list of genes analysed and expression values, see Excel Table S6. **C** Expression level-ranked heatmap of germ cell markers indicated in RNA-seq data generated from d5 aggregate FACS-purified DP/PGCLCs, derived from BVSC-R8 EpiLCs exposed to control (untreated) or 100 nM BPA. Candidate germ cell marker list taken from Hayashi et al. (Hayashi et al, 2011). Wilcoxon matched-pairs signed rank test p-value > 0.05.

**Figure S5.** Control FACS density plots of epiblast-like cells (EpiLCs) treated with DNA damaging agent (etoposide, 10 $\mu$ M), apoptosis inducing agent (doxorubicin, 500nM) or both. Numbers indicate proportion of live-gated events in quadrants indicated.

**Figure S6. Analysis of different d5 aggregate cell populations derived from epiblast-like cells (EpiLCs) exposed to Bisphenol A (BPA).** Scatter-bar plots showing absolute numbers of cells in the different gated sub-populations indicated following exposure of EpiLCs to different BPA doses indicated. Plots show mean +/- standard deviation. n = 8. For one-way ANOVA with Šidák-adjusted p values for comparison to water, see Supplemental Table 2. For numerical values, see Excel Table S10.

**Figure S7. Expression analysis of genes in apoptosis and DNA damage Biological Process terms in epiblast-like cells (EpiLCs) exposed to 100 nM Bisphenol A (BPA).** n indicates number of genes within each Gene Ontology GO term whose expression was detected in RNA-seq data set. For each plot, first set of data indicate 'untreated', followed by '100nM BPA-exposed'. For apoptosis, GO terms are as follows: GO:0008625 (extrinsic apoptotic signaling pathway via death domain receptors); GO:0012501(programmed cell death); GO:0043065 (positive regulation of apoptotic process); GO:0096915 (apoptotic process); GO:0097190 (apoptotic signaling pathway); GO:0097191 (extrinsic apoptotic signaling pathway); GO:1902255 (positive regulation of intrinsic apoptotic signaling pathway by p53 class mediator); GO:2001237 (negative regulation of extrinsic apoptotic signaling pathway); GO:2001244 (positive regulation of intrinsic apoptotic signaling pathway). For DNA damage, GO terms are as follows: GO:0000077 (DNA damage checkpoint); GO:0006974 (cellular response to DNA damage stimulus); GO:0030330 (DNA damage response, signal transduction by p53 class mediator); GO:0031572 (G2 DNA damage checkpoint); GO:0042770 (signal transduction in response to DNA damage); GO:0044773 (mitotic DNA damage checkpoint); GO:0072422 (signal transduction involved in DNA damage checkpoint); GO:0090734 (site of DNA damage); GO:1902402 (signal transduction involved in mitotic DNA damage checkpoint); GO:2001020 (regulation of response to DNA damage stimulus). Asterisks indicate results of Wilcoxon matched-pairs signed rank tests. For p-values, see Excel Table S13.

**Figure S8. Circular Gene Ontology (CirGO) plot of enriched Cellular Component GO terms for genes upregulated in day 5 (d5) PGC-like cells (PGCLCs) derived from epiblast-like cells (EpiLCs) exposed to 100 nM Bisphenol A (BPA).**

**Figure S9. Candidate gene expression analysis in day 5 (d5) PGC-like cells (PGCLCs) derived from epiblast-like cells (EpiLCs) exposed to 100 nM Bisphenol A BPA. (A-C)** Heatmap view of data presented in Figure 5. (D) Scatter-box plot showing expression level of *Stra8*. Mean  $\pm$  s.d.,  $n = 3$ . Mann-Whitney  $p$  value = 0.2. (E) Heatmap view of expression levels of annotated nuclear hormone receptors indicated in PGCLCs derived from untreated or BPA-exposed EpiLCs. Asterisks indicate NHRs found to be differentially expressed. Estrogen and retinoic acid receptor genes indicated in bold. Benjamini-Hochberg adjusted  $p$ -values:  $< 0.0001$  (*Hnf4a*). For all heatmaps, first and second columns are untreated and 100nM BPA samples, respectively. Scale bars for all heat maps represent  $\log_{10}$  cpm.

**Figure S10. Heatmap view of data presented in Figure 5D-G, showing expression for meiosis-associated Gene Ontology (GO) gene sets indicated.** First and second columns are untreated and 100 nM Bisphenol A (BPA) samples, respectively. Scale bars for all heat maps represent  $\log_{10}$  cpm.

**Figure S11. Expression analysis of genes in meiosis-associated Biological Process terms.**  $n$  indicates number of genes within each Gene Ontology (GO) term whose expression was detected in RNA-seq data set. GO terms are as follows: GO:0007127 (meiosis I); GO:0045143 (homologous chromosome segregation); GO:0007144 (female meiosis I); GO:0000212 (meiotic spindle organization); GO:0000712 (resolution of meiotic recombination intermediates); GO:0007057 (spindle assembly involved in female meiosis I); GO:0007129 (synapsis); GO:0007131 (reciprocal meiotic recombination); GO:0007140 (male meiotic nuclear division); GO:0007143 (female meiotic nuclear division); GO:0016321 (female meiosis chromosome segregation); GO:0030893 (meiotic cohesin complex); GO:0034991 (nuclear meiotic cohesin complex); GO:0034993 (meiotic nuclear membrane microtubule tethering complex); GO:0040020 (regulation of meiotic nuclear division); GO:0040038 (polar body extrusion after meiotic divisions); GO:0044778 (meiotic DNA integrity checkpoint); GO:0045141 (meiotic telomere clustering); GO:0045835 (negative regulation of meiotic nuclear division); GO:0060903 (positive regulation of meiosis I); GO:0070197 (meiotic attachment of telomere to nuclear envelope); GO:0072687 (meiotic spindle); GO:1990918 (double-strand break repair involved in meiotic recombination); GO:0007135 (meiosis II); GO:0044771 (meiotic cell cycle phase transition); and GO:0045144 (meiotic sister chromatid segregation). For Wilcoxon matched-pairs signed rank test  $p$ -values, see Excel Table S20.

**Figure S12. Expression analysis of factors involved in epigenetic processes in day 5 (d5) PGC-like cells (PGCLCs) derived from epiblast-like cells (EpiLCs).** (A-E) Violin plots showing expression levels of different genes in the sets indicated. n indicates number of genes within each Gene Ontology (GO) term whose expression was detected in RNA-seq data set. Wilcoxon matched-pairs signed rank test p-values: < 0.01 (both GO: positive regulation of GO: protein maturation and negative regulation of transcription by RNA polymerase II); > 0.05 (GO: DNA methylation); > 0.05 (GO: histone methylation); and > 0.05 (GO: piRNA metabolic process).

**Figure S13. Expression analysis of mammalian host factors involved in retrotransposon regulation.** Heat map showing expression levels of factors indicated. Wilcoxon matched-pairs signed rank test p-values > 0.05 for Epigenetic/Nuclear Factor; KRAB-Zinc Finger; Transcription Factor; piRNA/RNAi Pathway; and Post-transcriptional. List of factors obtained from Goodier (Goodier, 2016).

**Additional File-** Excel Document

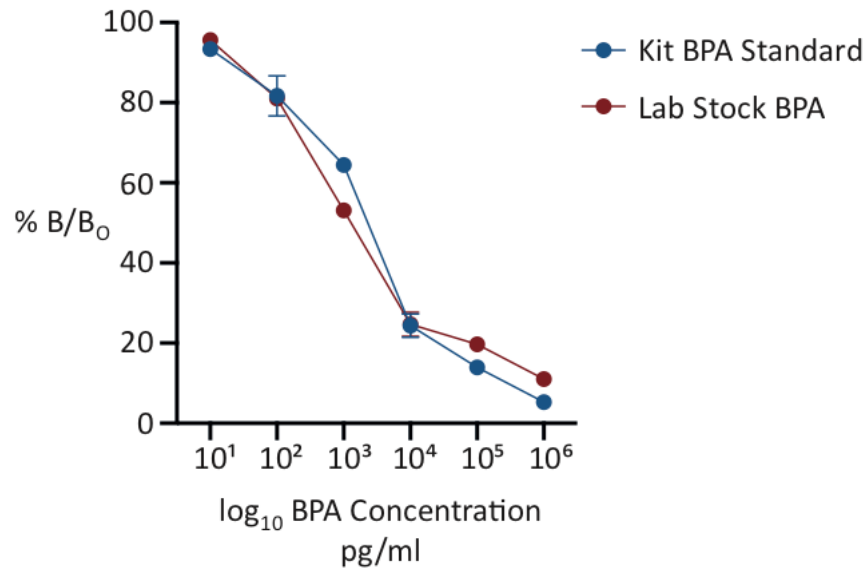

**Supplemental Figure S1. Line graph showing ELISA standard curves generated using either kit-supplied or in-lab dissolved Bisphenol A (BPA) used in experiments.** Data generated using BPA ELISA Kit, Detroit R & D, Inc. B indicates absorbance at 450nm observed at defined concentrations; B<sub>0</sub> indicates absorbance at 450nm observed in maximum binding wells (Sample Dilution Buffer only). For numerical values, see Excel Table S1.

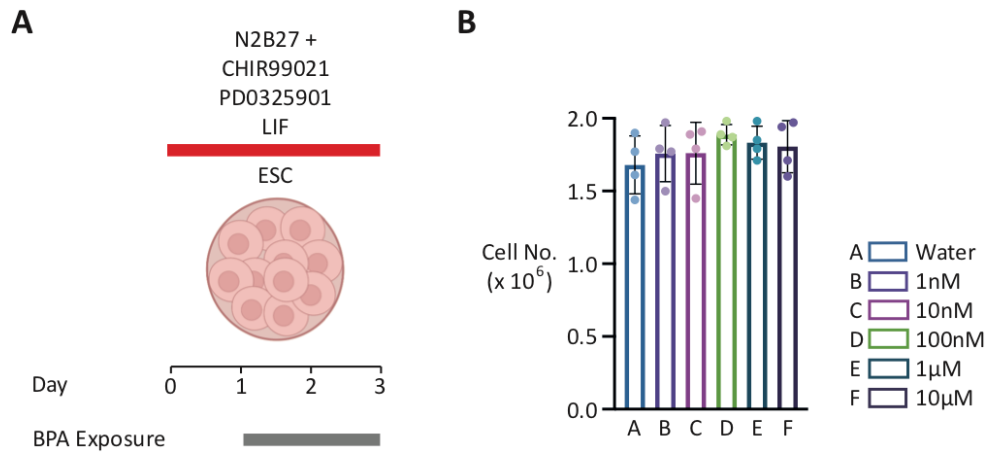

**Supplemental Figure S2. Cell number analysis of following 48-hour Bisphenol A (BPA) exposure of ESCs.** (A) Cartoon showing BPA exposure strategy. . Illustration in part created with ©BioRender - biorender.com, as per the Biorender terms and conditions. Abbreviations are: Embryonic stem cell (ESC) and Leukmia inhibitory factor (LIF). (B) Scatter-bar plot indicating cell counts of Blimp1-mVenus stella-ECFP (BVSC) ESCs exposed to the different BPA doses indicated: error bars indicate mean +/- standard deviation. n = 4 for each condition. One-way ANOVA, p > 0.05. Calculated one-way ANOVA with Šidák-adjusted p values for comparison to water: p > 0.05 (vs. 1 nM); p > 0.05 (vs. 10 nM), p > 0.05 (vs. 100 nM); p > 0.05 (vs. 1 µM); and p > 0.05 (vs. 10 µM). For numerical values, see Excel Table S3.

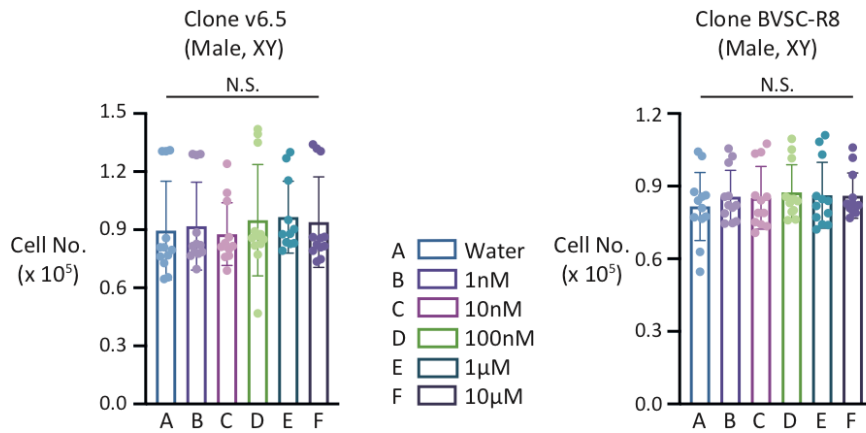

**Supplemental Figure S3. Cell number analysis of two male (XY) epiblast-like cell (EpiLC) cell lines following Bisphenol A (BPA) exposure.** Scatter-bar plot indicating cell counts of epiblast-like cells (EpiLCs) derived from either a wild-type Embryonic stem (ES) cell line (v6.5) or male *Blimp1-mVenus stella-EGFP* (BVSC) cell line (R8) exposed to the different Bisphenol A (BPA) doses indicated: error bars represent mean  $\pm$  standard deviation.  $n = 12$  for each condition. One-way ANOVA  $p$ -values are  $> 0.05$  for both (v6.5) and BVSC-R8). For numerical values, see Excel Table S3.

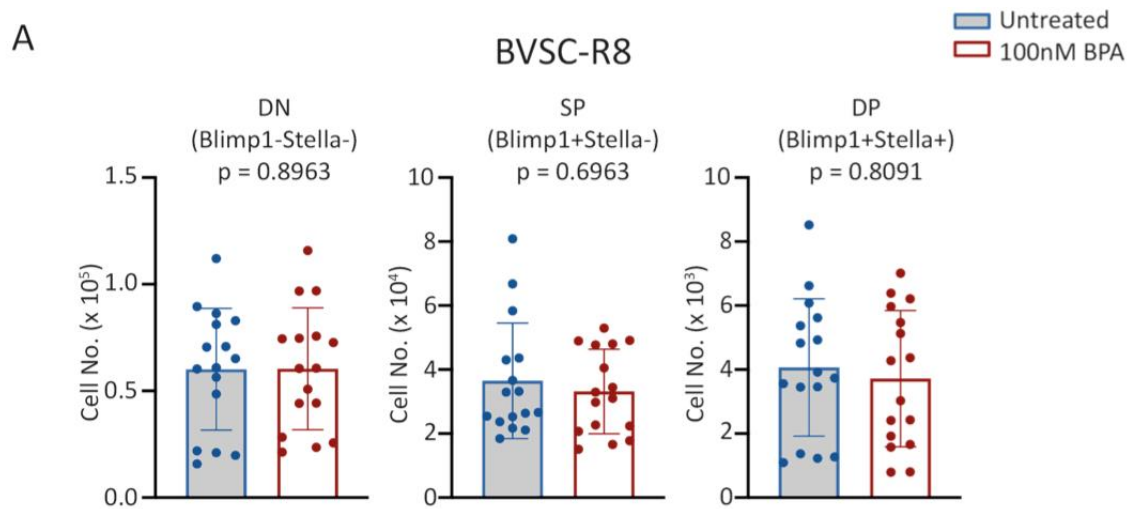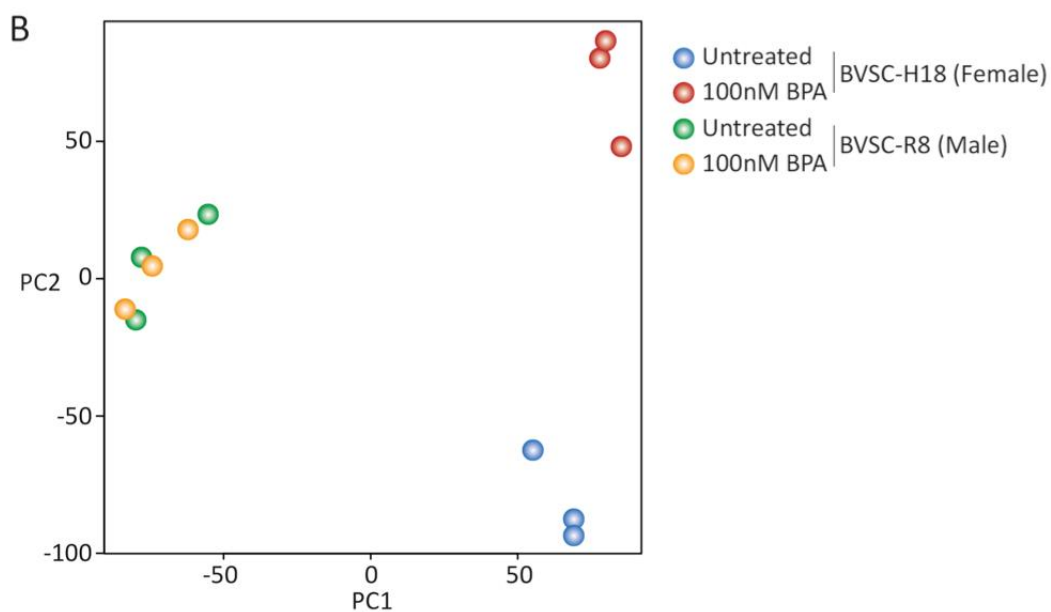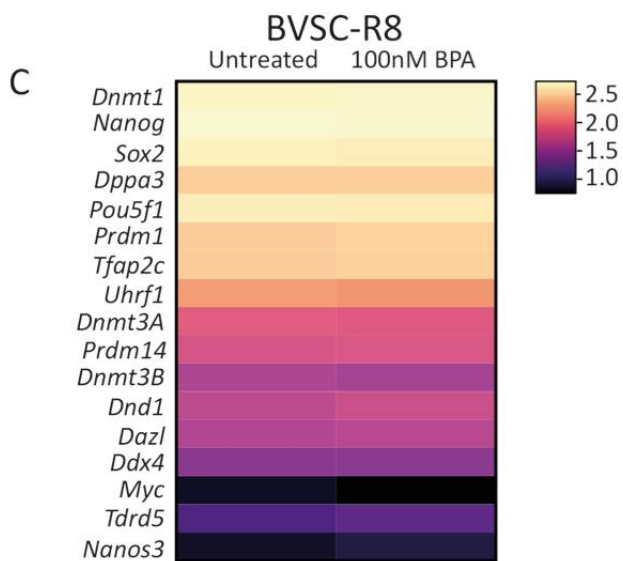



**Supplemental Figure S4. Cell number and transcriptome analysis of day 5 (d5) PGC-like cells (PGCLCs) derived from Bisphenol A (BPA)-exposed male (XY) epiblast-like cells (EpiLCs).** **A** Scatter-bar plots showing absolute numbers of BVSC-R8 (male) cells in the different gated sub-populations indicated following exposure of EpiLCs to 100nM BPA. Error bars represent mean +/- standard deviation. n = 16 for each condition. Mann-Whitney Test p-values for R8 are > 0.05 for live cells; Blimp1<sup>-</sup>Stella<sup>-</sup>/DN (non-germ cells); Blimp1<sup>+</sup>Stella<sup>-</sup>/SP (presumed transitioning germ cells); and Blimp1<sup>+</sup>Stella<sup>+</sup>/DP (PGCLCs). For numerical values, see Excel Table S4. **B** Principal Component Analysis (PCA) of transcriptome of d5 DP/BVSC cells, derived from untreated or 100 nM BPA-exposed EpiLCs. For full list of genes analysed and expression values, see Excel Table S6. **C** Expression level-ranked heatmap of germ cell markers indicated in RNA-seq data generated from d5 aggregate FACS-purified DP/PGCLCs, derived from BVSC-R8 EpiLCs exposed to control (untreated) or 100 nM BPA. Candidate germ cell marker list taken from Hayashi et al. (Hayashi et al, 2011). Wilcoxon matched-pairs signed rank test p-value > 0.05.

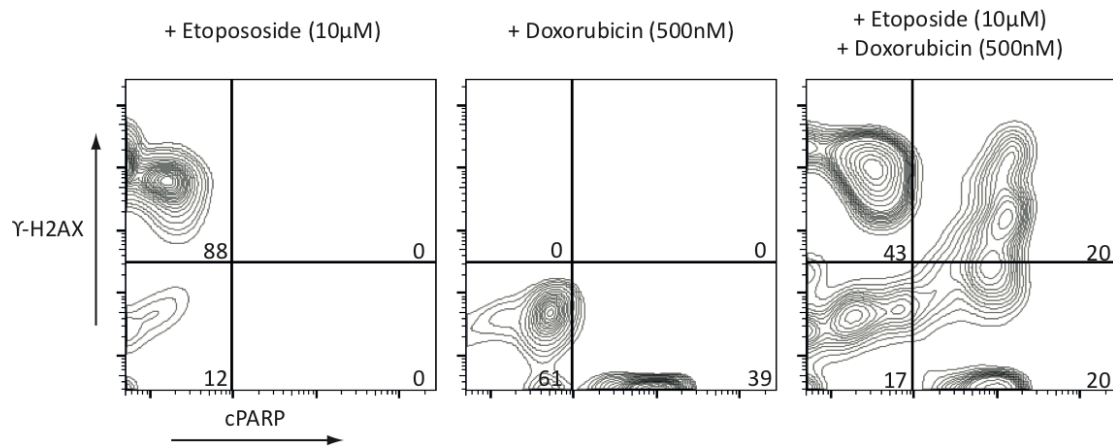

**Supplemental Figure S5.** Control FACS density plots of epiblast-like cells (EpiLCs) treated with DNA damaging agent (etoposide, 10 $\mu$ M), apoptosis inducing agent (doxorubicin, 500nM) or both. Numbers indicate proportion of live-gated events in quadrants indicated.

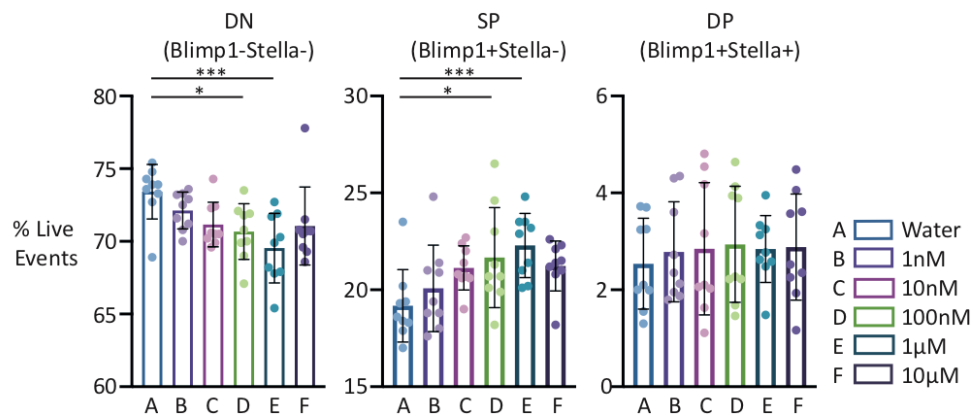

**Supplemental Figure S6. Analysis of different d5 aggregate cell populations derived from epiblast-like cells (EpiLCs) exposed to Bisphenol A (BPA).**

Scatter-bar plots showing absolute numbers of cells in the different gated sub-populations indicated following exposure of EpiLCs to different BPA doses indicated. Plots show mean +/- standard deviation. n = 8. For one-way ANOVA with Šidák-adjusted p values for comparison to water, see Supplemental Table 2. For numerical values, see Excel Table S10.

**A****Apoptosis GO Terms**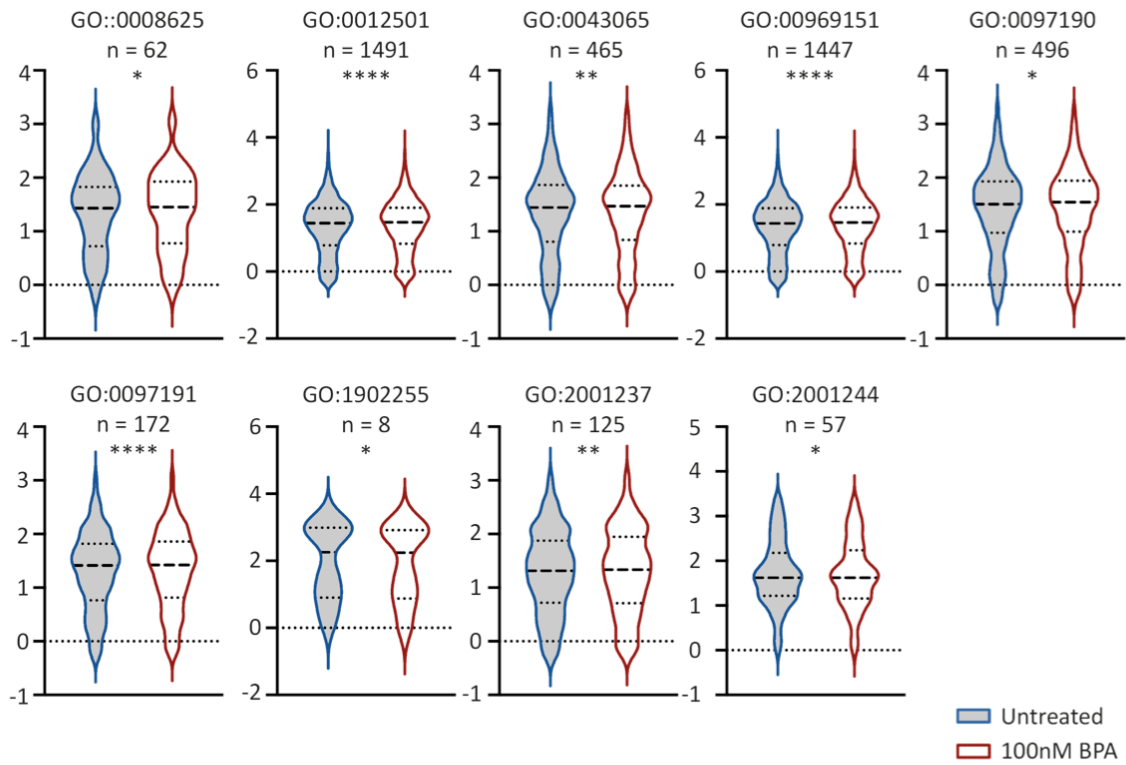**B****DNA Damage GO Terms**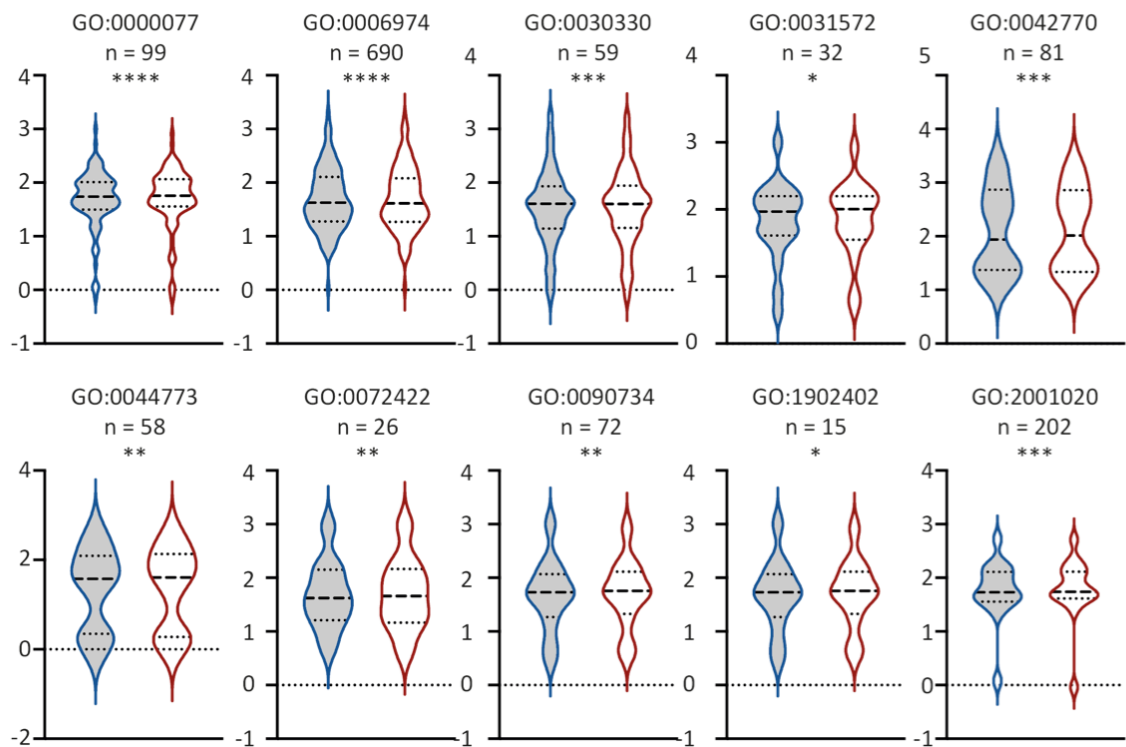

**Supplemental Figure S7. Expression analysis of genes in apoptosis and DNA damage Biological Process terms in epiblast-like cells (EpiLCs) exposed to 100 nM Bisphenol A (BPA).** n indicates number of genes within each Gene Ontology GO term whose expression was detected in RNA-seq data set. For each plot, first set of data indicate 'untreated', followed by '100nM BPA-exposed'. For apoptosis, GO terms are as follows: GO:0008625 (extrinsic apoptotic signaling pathway via death domain receptors); GO:0012501(programmed cell death); GO:0043065 (positive regulation of apoptotic process); GO:0096915 (apoptotic process); GO:0097190 (apoptotic signaling pathway); GO:0097191 (extrinsic apoptotic signaling pathway); GO:1902255 (positive regulation of intrinsic apoptotic signaling pathway by p53 class mediator); GO:2001237 (negative regulation of extrinsic apoptotic signaling pathway); GO:2001244 (positive regulation of intrinsic apoptotic signaling pathway). For DNA damage, GO terms are as follows: GO:0000077 (DNA damage checkpoint); GO:0006974 (cellular response to DNA damage stimulus); GO:0030330 (DNA damage response, signal transduction by p53 class mediator); GO:0031572 (G2 DNA damage checkpoint); GO:0042770 (signal transduction in response to DNA damage); GO:0044773 (mitotic DNA damage checkpoint); GO:0072422 (signal transduction involved in DNA damage checkpoint); GO:0090734 (site of DNA damage); GO:1902402 (signal transduction involved in mitotic DNA damage checkpoint); GO:2001020 (regulation of response to DNA damage stimulus). Asterisks indicate results of Wilcoxon matched-pairs signed rank tests. For p-values, see Excel Table S13.

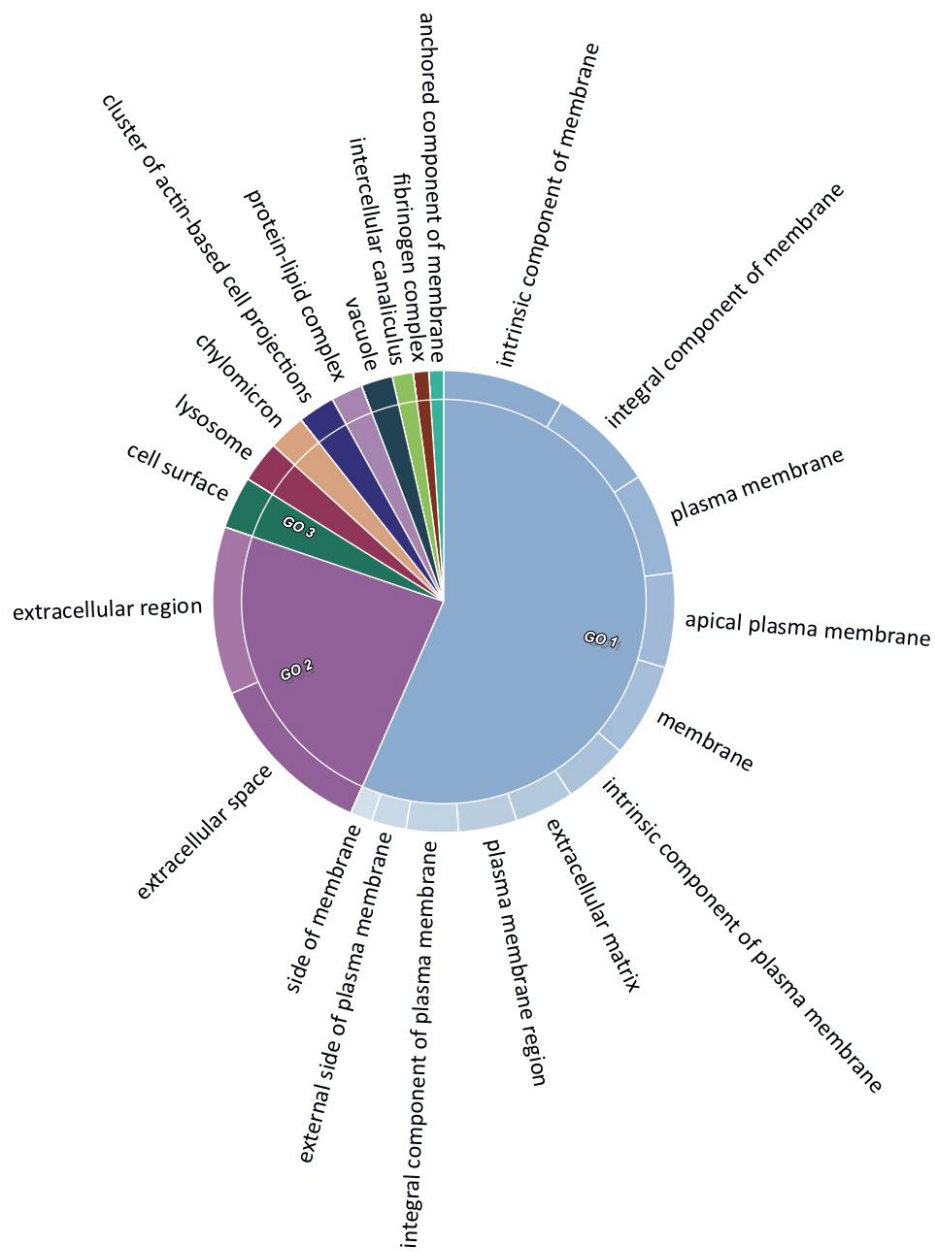

**Supplemental Figure S8. Circular Gene Ontology (CirGO) plot of enriched Cellular Component GO terms for genes upregulated in day 5 (d5) PGC-like cells (PGCLCs) derived from epiblast-like cells (EpiLCs) exposed to 100 nM Bisphenol A (BPA).**

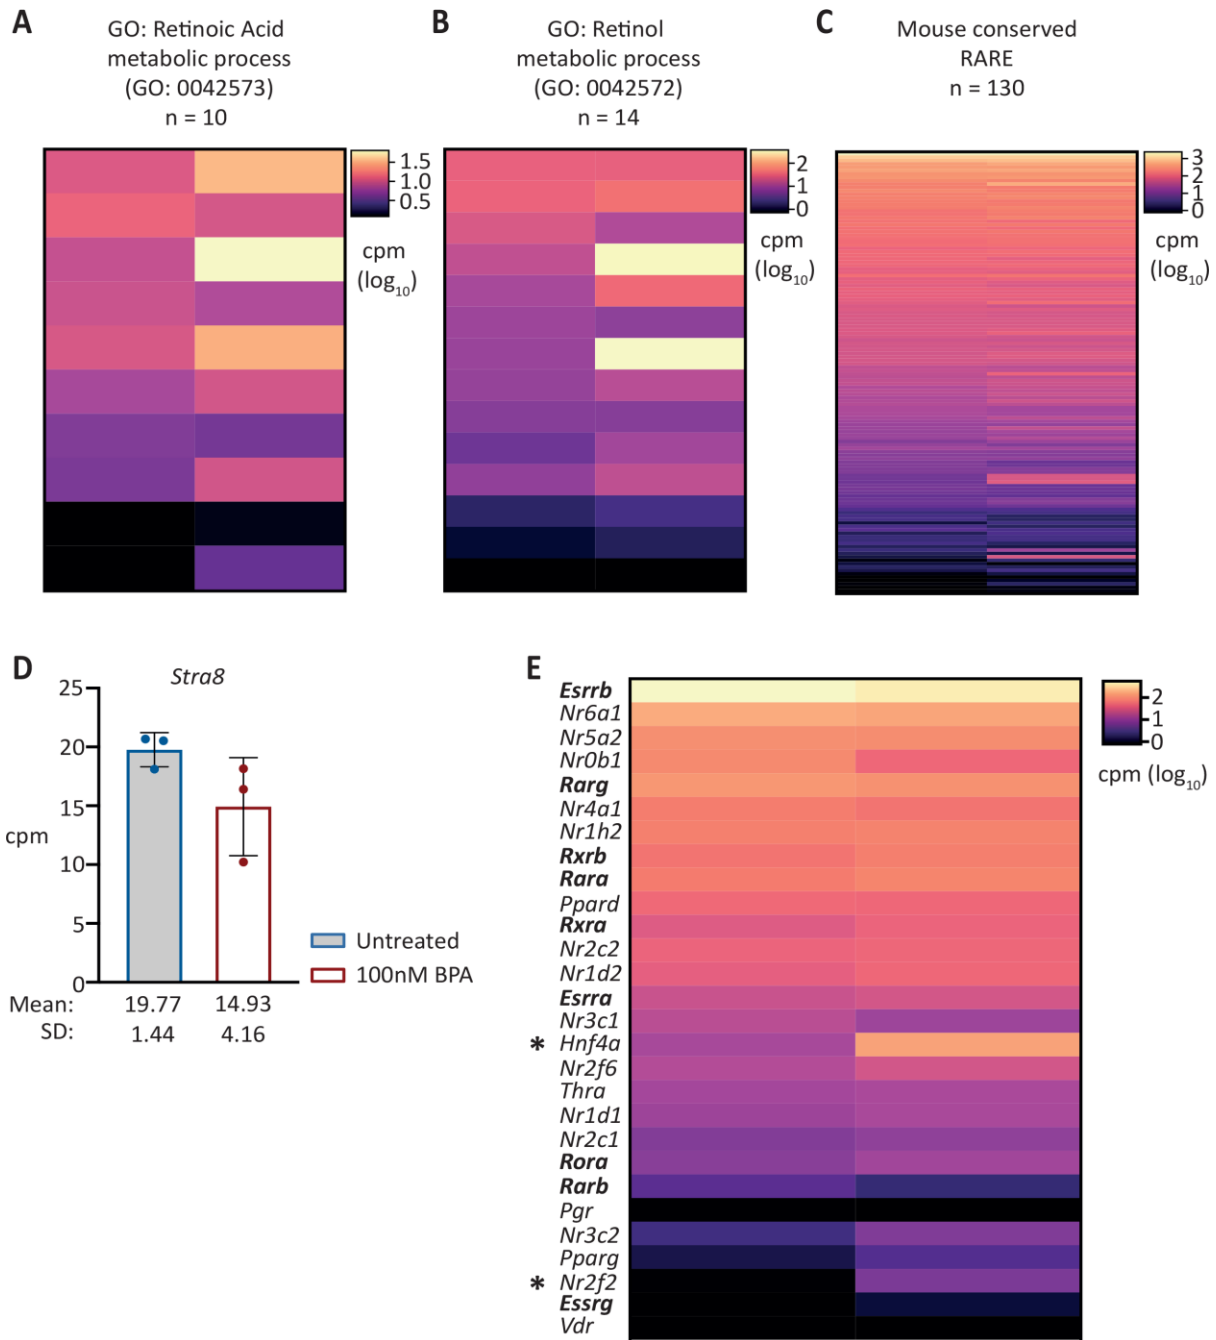

**Supplemental Figure S9. Candidate gene expression analysis in day 5 (d5) PGC-like cells (PGCLCs) derived from epiblast-like cells (EpiLCs) exposed to 100 nM Bisphenol A (BPA).** (A-C) Heatmap view of data presented in Figure 5. (D) Scatter-box plot showing expression level of *Stra8*. Mean  $\pm$  s.d., n = 3. Mann-Whitney p value = 0.2. (E) Heatmap view of expression levels of annotated nuclear hormone receptors indicated in PGCLCs derived from untreated or BPA-exposed EpiLCs. Asterisks indicate NHRs found to be differentially expressed. Estrogen and retinoic acid receptor genes indicated in bold. Benjamini-Hochberg adjusted p-values: < 0.0001 (*Hnf4a*). For all heatmaps, first and second columns are untreated and 100nM BPA samples, respectively. Scale bars for all heat maps represent  $\log_{10}$  cpm.

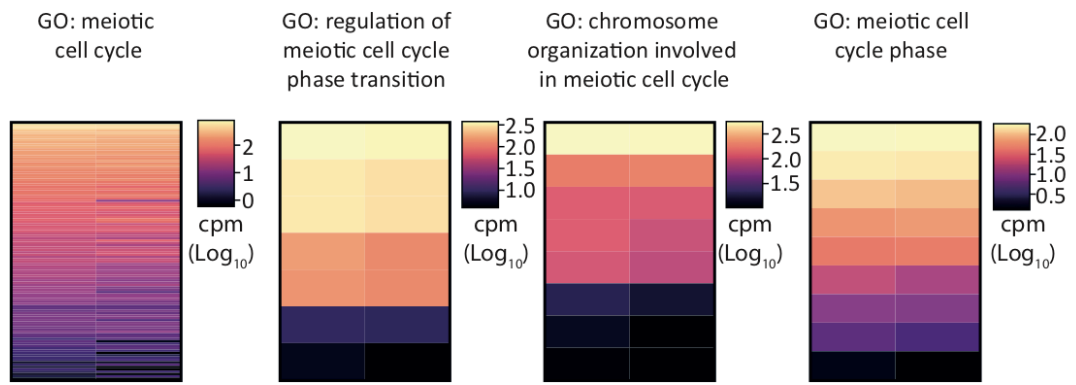

**Supplemental Figure S10. Heatmap view of data presented in Figure 5D-G, showing expression for meiosis-associated Gene Ontology (GO) gene sets indicated.** First and second columns are untreated and 100 nM Bisphenol A (BPA) samples, respectively. Scale bars for all heat maps represent log<sub>10</sub> cpm.



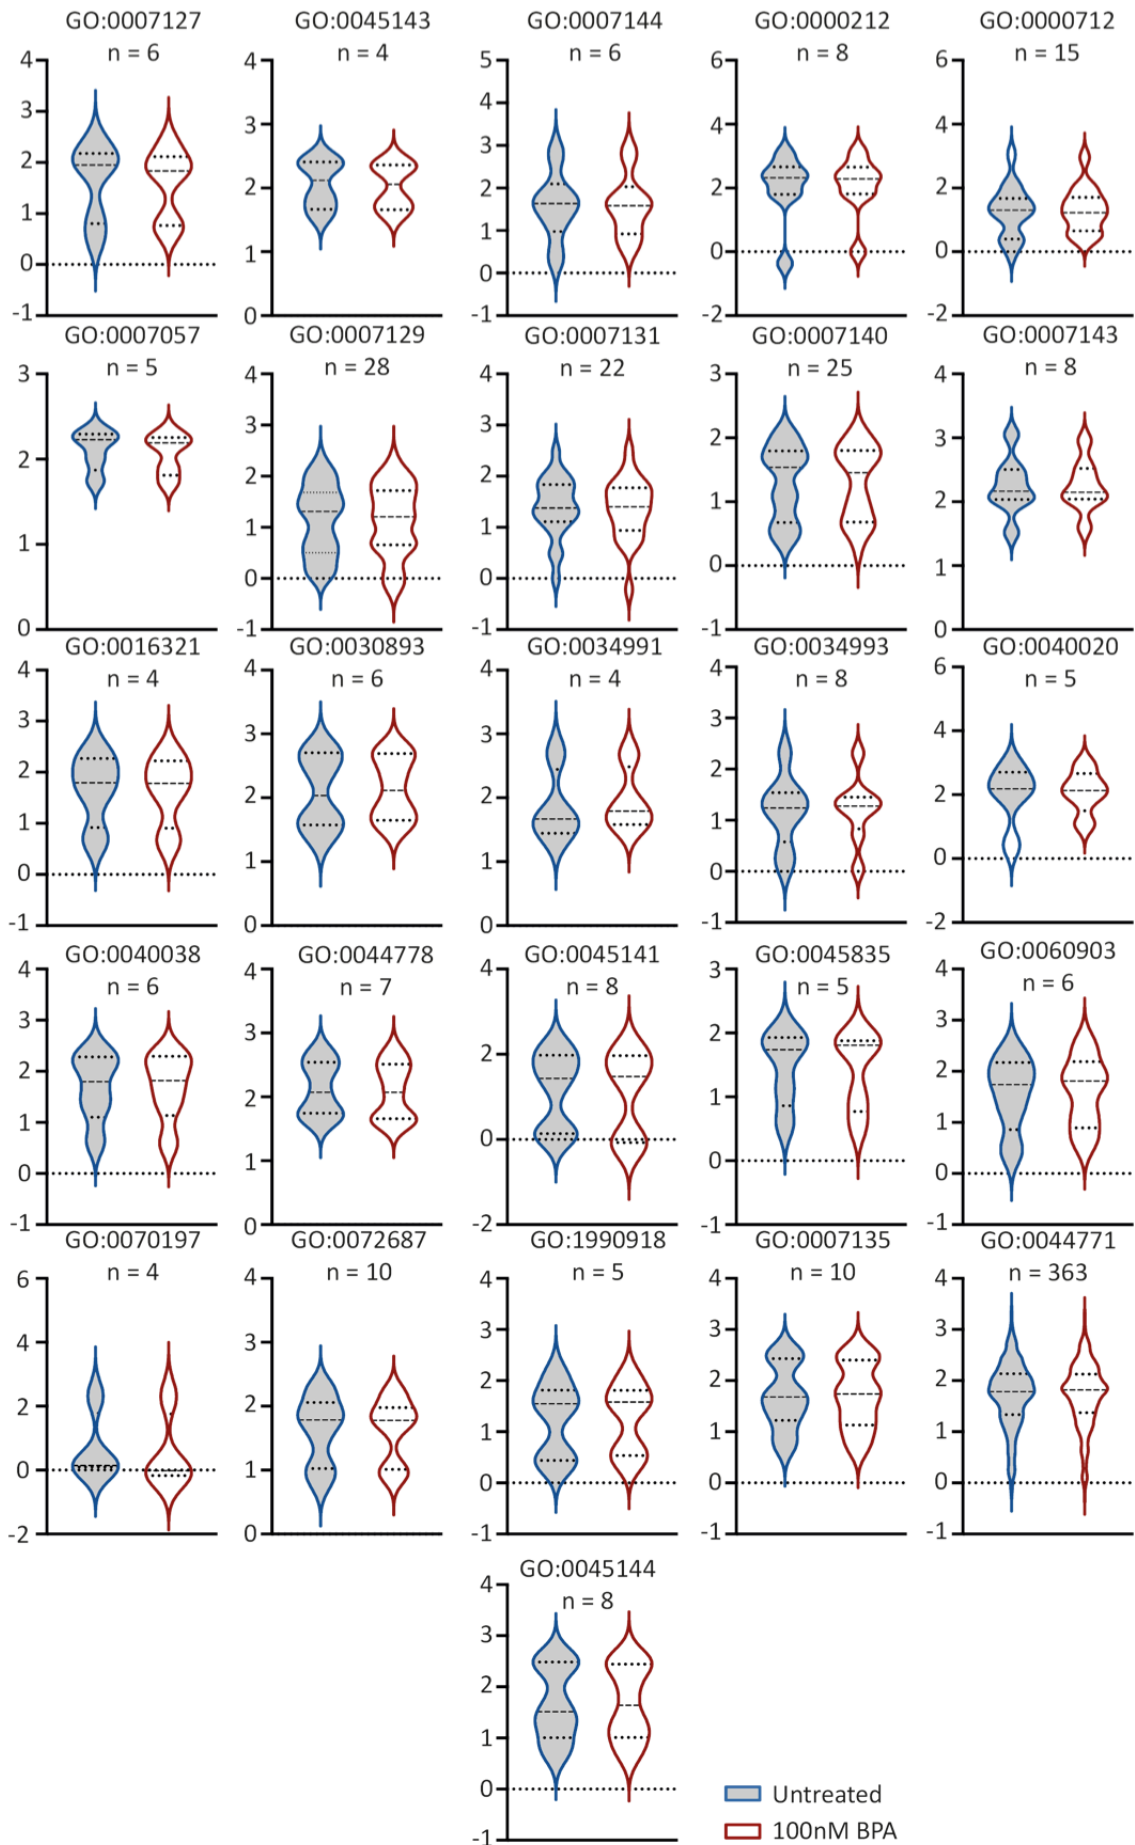

**Supplemental Figure S11. Expression analysis of genes in meiosis-associated Biological Process terms.**

n indicates number of genes within each Gene Ontology (GO) term whose expression was detected in RNA-seq data set. GO terms are as follows: GO:0007127 (meiosis I); GO:0045143 (homologous chromosome segregation); GO:0007144 (female meiosis I); GO:0000212 (meiotic spindle organization); GO:0000712 (resolution of meiotic recombination intermediates); GO:0007057 (spindle assembly involved in female meiosis I); GO:0007129 (synapsis); GO:0007131 (reciprocal meiotic recombination); GO:0007140 (male meiotic nuclear division); GO:0007143 (female meiotic nuclear division); GO:0016321 (female meiosis chromosome segregation); GO:0030893 (meiotic cohesin complex); GO:0034991 (nuclear meiotic cohesin complex); GO:0034993 (meiotic nuclear membrane microtubule tethering complex); GO:0040020 (regulation of meiotic nuclear division); GO:0040038 (polar body extrusion after meiotic divisions); GO:0044778 (meiotic DNA integrity checkpoint); GO:0045141 (meiotic telomere clustering); GO:0045835 (negative regulation of meiotic nuclear division); GO:0060903 (positive regulation of meiosis I); GO:0070197 (meiotic attachment of telomere to nuclear envelope); GO:0072687 (meiotic spindle); GO:1990918 (double-strand break repair involved in meiotic recombination); GO:0007135 (meiosis II); GO:0044771 (meiotic cell cycle phase transition); and GO:0045144 (meiotic sister chromatid segregation). For Wilcoxon matched-pairs signed rank test p-values, see Excel Table S20.

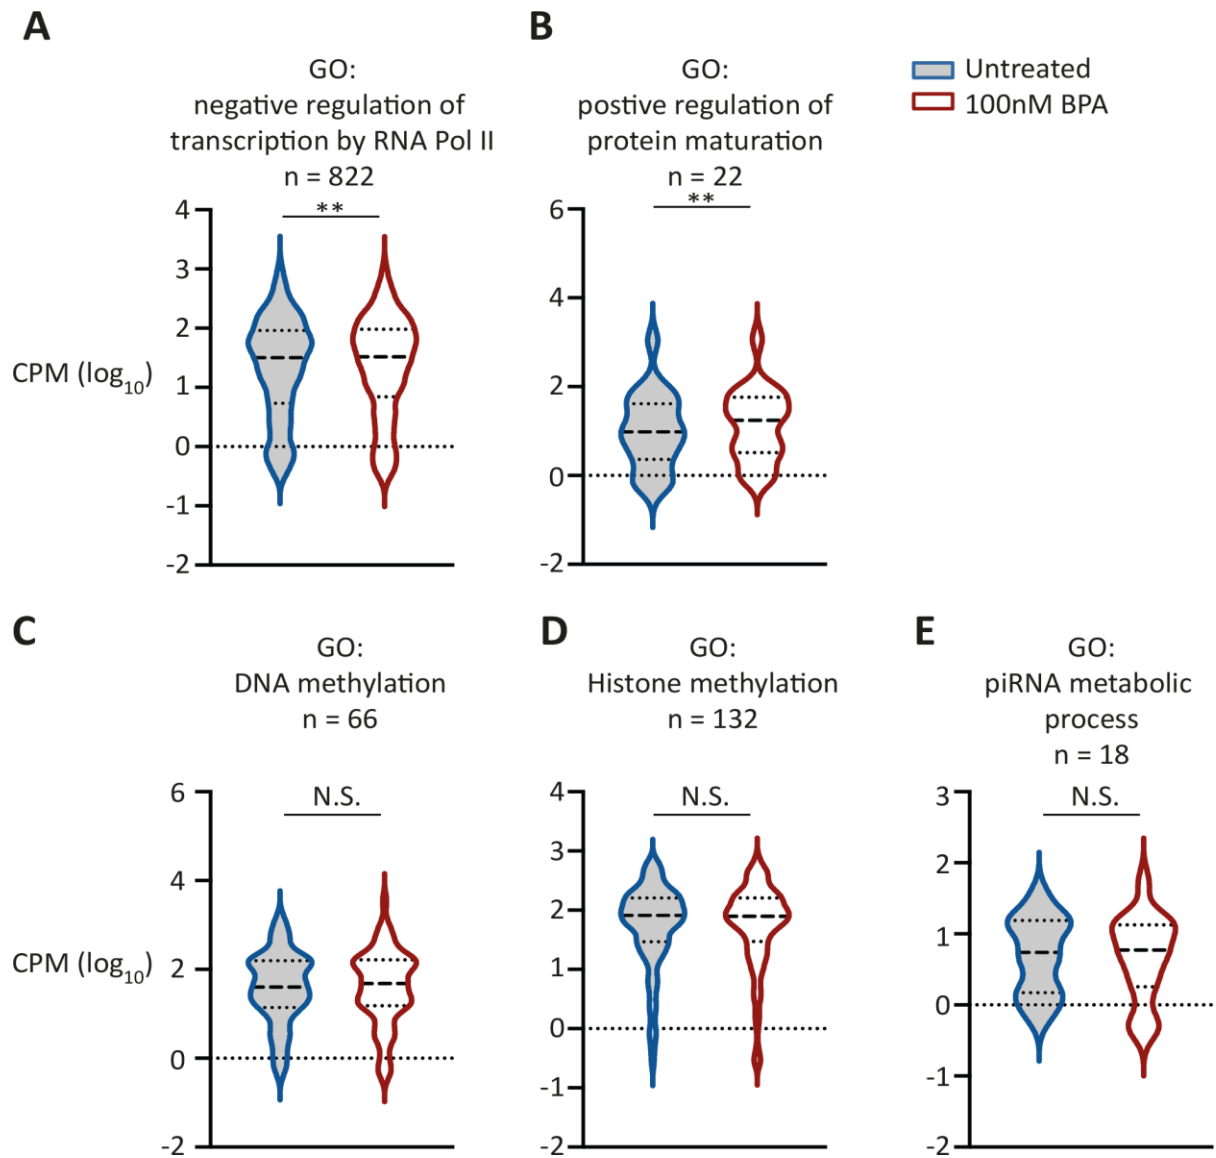

**Supplemental Figure S12. Expression analysis of factors involved in epigenetic processes in day 5 (d5) PGC-like cells (PGCLCs) derived from epiblast-like cells (EpiLCs).** (A-E) Violin plots showing expression levels of different genes in the sets indicated. n indicates number of genes within each Gene Ontology (GO) term whose expression was detected in RNA-seq data set. Wilcoxon matched-pairs signed rank test p-values: < 0.01 (both GO: positive regulation of GO: protein maturation and negative regulation of transcription by RNA polymerase II); > 0.05 (GO: DNA methylation); > 0.05 (GO: histone methylation); and > 0.05 (GO: piRNA metabolic process).

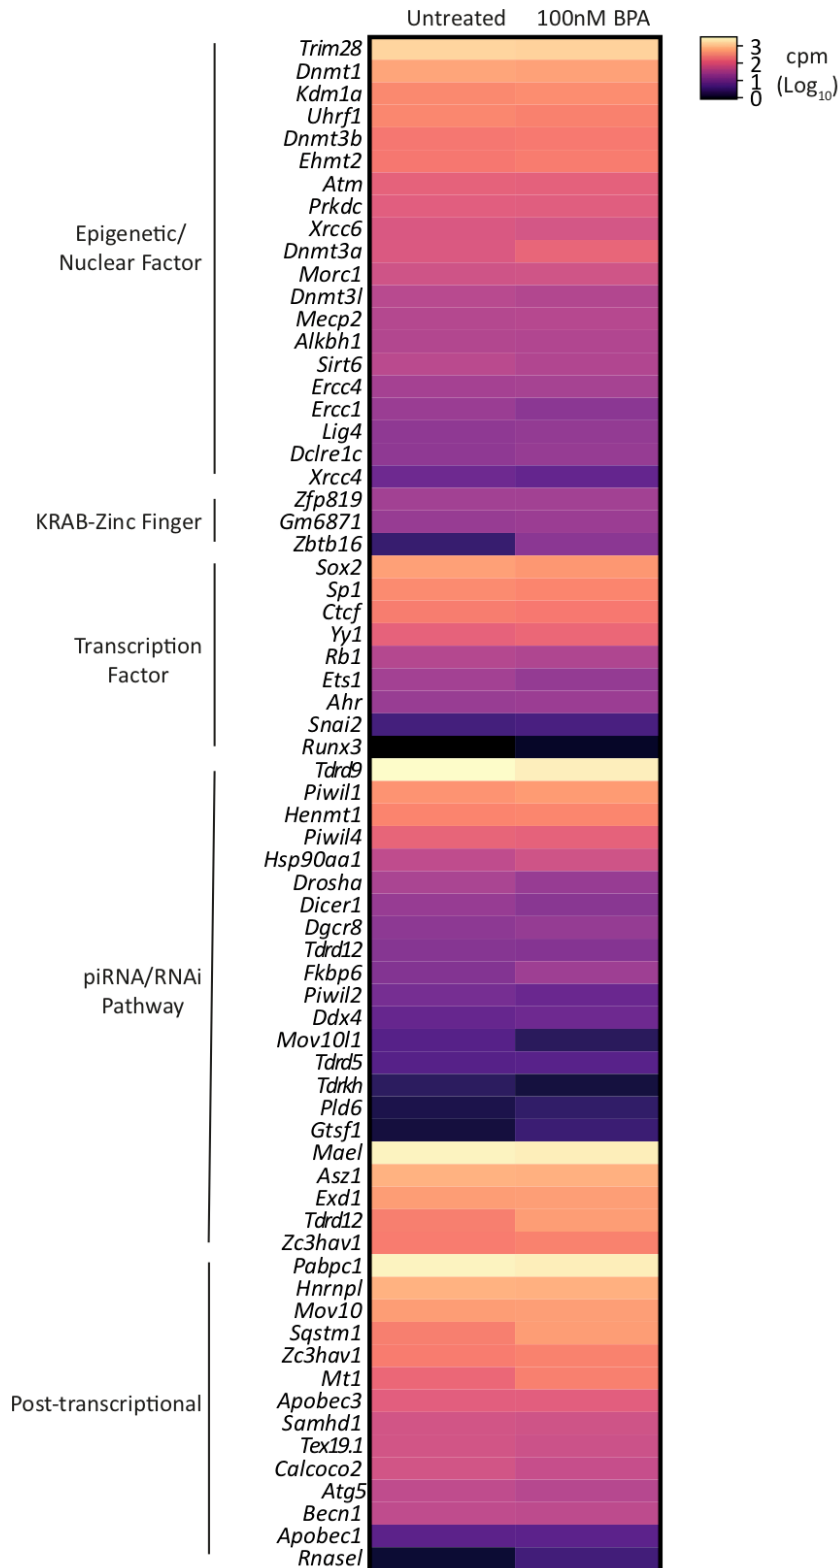

**Supplemental Material S13. Expression analysis of mammalian host factors involved in retrotransposon regulation.** Heat map showing expression levels of factors indicated. Wilcoxon matched-pairs signed rank test p-values > 0.05 for

Epigenetic/Nuclear Factor; KRAB-Zinc Finger; Transcription Factor; piRNA/RNAi Pathway; and Post-transcriptional. List of factors obtained from Goodier (Goodier, 2016).
